# Supplementary material
Source: Springer Nature journal article supplement (https://www.springermedizin.de/resource/supplementary/12970_2007_47_MOESM1_ESM.pdf/9594242)
Supplement: MOESM1 [file 9594242]

| Race/Ethnicity                   | N    | Percent |
|----------------------------------|------|---------|
| Caucasian/White                  | 1727 | 88.5%   |
| Hispanic/Latino                  | 83   | 4.3%    |
| Multi or Biracial                | 41   | 2.1%    |
| Asian                            | 26   | 1.3%    |
| African-American                 | 25   | 1.3%    |
| Native American                  | 19   | 1.0%    |
| Middle Eastern                   | 12   | 0.6%    |
| Other                            | 11   | 0.6%    |
| Pacific Islander/Native Hawaiian | 7    | 0.4%    |
